# Supplementary material for: TET1-mediated DNA hypomethylation regulates the expression of MUC4 in lung cancer
Source: PubMed Central journal article supplement (PMC5489649; doi:10.18632/genesandcancer.139), 2017-03
Supplement: ganc-08-517-s001.pdf [file ganc-08-517-s001.pdf]

## TET1-mediated DNA hypomethylation regulates the expression of MUC4 in lung cancer – Yokoyama et al

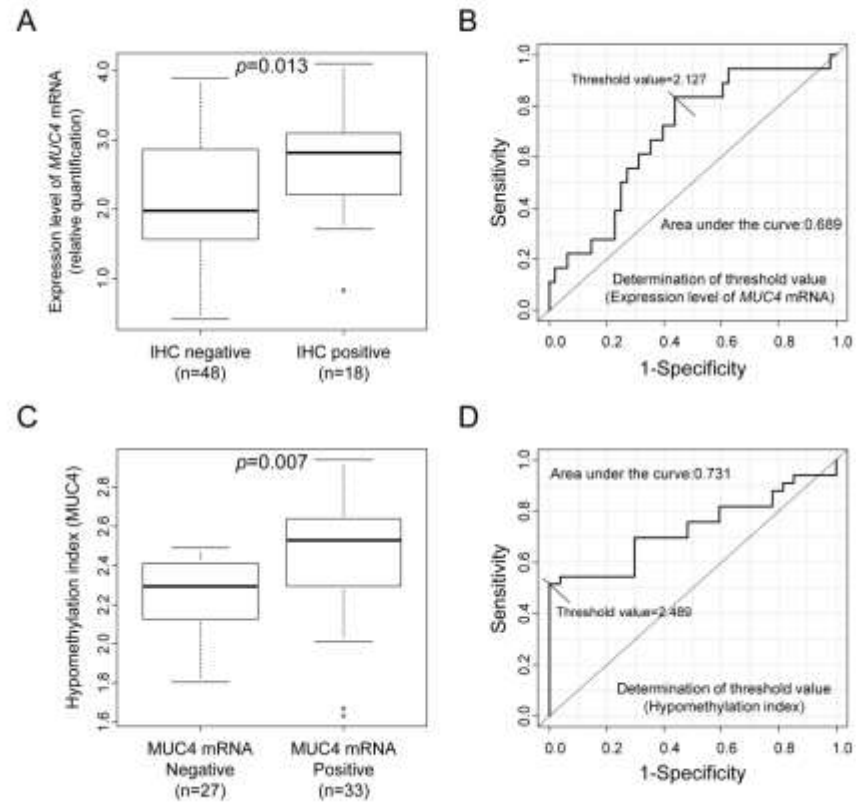

**Supplementary Figure 1: ROC analysis for determination of threshold value.** (A) Comparison of the expression level of *MUC4* mRNA between the group found to be *MUC4* negative and the group found to be *MUC4* positive by IHC analysis. The IHC positive group showed a higher expression level of *MUC4* than the IHC negative group. (B) Calculation of the threshold value of *MUC4* mRNA between *MUC4* negative and *MUC4* positive groups (as determined by IHC analysis). The threshold value (2.127) of mRNA expression between the *MUC4* negative and *MUC4* positive groups was calculated by ROC analysis. (C) Comparison of the hypomethylation index of the *MUC4* promoter between *MUC4* negative and *MUC4* positive groups (mRNA expression). The *MUC4* mRNA-positive group showed a higher hypomethylation index than the *MUC4* mRNA negative group. (D) Calculation of the threshold value of the *MUC4* hypomethylation index between *MUC4* negative and *MUC4* positive groups (mRNA expression). The threshold value (2.489) to differentiate between hypo-methylation and hyper-methylation of the *MUC4* promoter was calculated by ROC analysis.

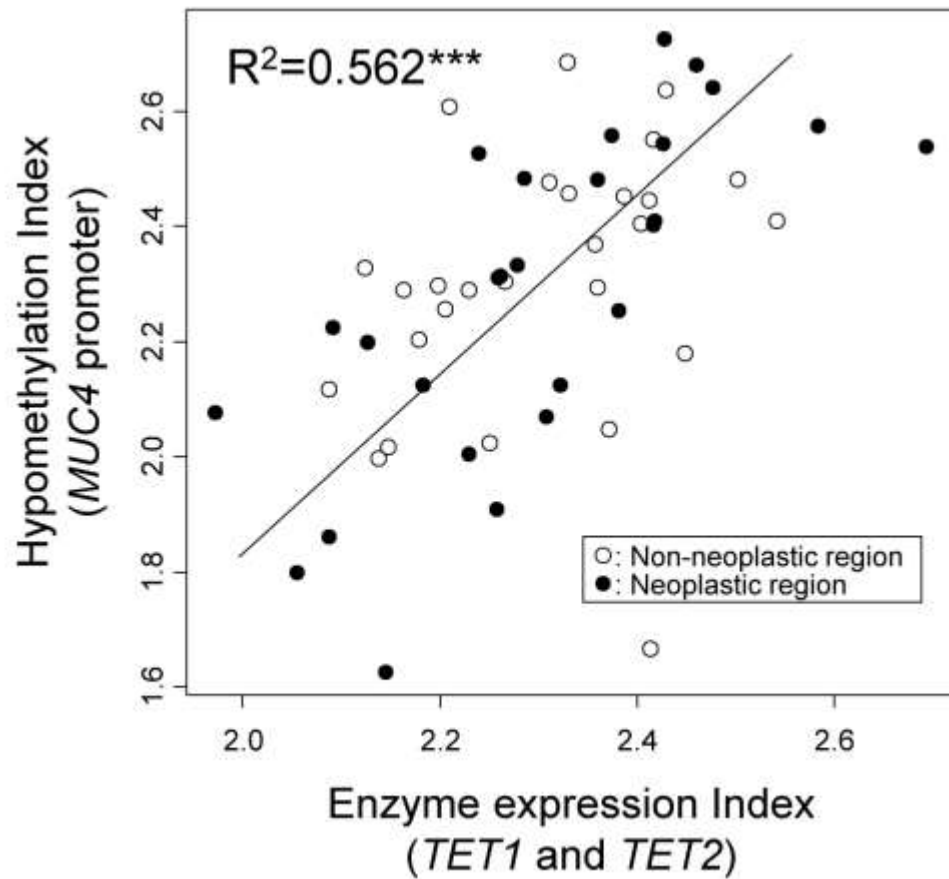

**Supplementary Figure 2: Multiple regression analysis of the expression level of DNA demethylation-related enzymes against the hypomethylation status of the *MUC4* promoter.** The multiple regression predictive value was obtained with the following formula:  $F_m(\text{Enzyme expression index for } MUC4) = 1.8 + 0.23(TET1) + 0.17(TET2)$ . R<sup>2</sup>: R squared, \*\*\*:  $p < 0.001$ , \*\*:  $p < 0.01$ , \*:  $p < 0.05$ , ○: non-neoplastic region, ●: neoplastic region.

Table S1. Clinicopathological features

|           |                                      |          |         |
|-----------|--------------------------------------|----------|---------|
| Age       | Median                               | ±SD      |         |
|           | 69                                   | ±9.0     |         |
| Sex       |                                      | n        | (%)     |
|           | F                                    | 18       | (54.5%) |
|           | M                                    | 15       | (45.4%) |
| Size      | Median                               | ±SD (mm) |         |
|           | 25                                   | ±10.2    |         |
| T         |                                      | n        | (%)     |
|           | 1a                                   | 8        | (24.2%) |
|           | 1b                                   | 10       | (30.3%) |
|           | 2a                                   | 12       | (36.3%) |
|           | 2b                                   | 2        | (6%)    |
|           | 3                                    | 1        | (3%)    |
| N         |                                      | n        | (%)     |
|           | negative                             | 31       | (93.9%) |
|           | positive                             | 2        | (6%)    |
| M         |                                      | n        | (%)     |
|           | negative                             | 32       | (96.9%) |
|           | positive                             | 1        | (3%)    |
| ly        |                                      | n        | (%)     |
|           | negative                             | 9        | (27.2%) |
|           | positive                             | 24       | (72.7%) |
| v         |                                      | n        | (%)     |
|           | negative                             | 19       | (57.5%) |
|           | positive                             | 14       | (42.4%) |
| Pathology |                                      | n        | (%)     |
|           | Adenocarcinoma                       |          |         |
|           | n=                                   | 31       | (91.1%) |
|           | Keratinizing squamous cell carcinoma |          |         |
|           | n=                                   | 2        | (5.8%)  |
|           | Adenosquamous carcinoma              |          |         |
|           | n=                                   | 1        | (2.9%)  |
|           | Solid adenocarcinoma                 |          |         |
|           | n=                                   | 1        | (2.9%)  |

|                          |    |    |         |
|--------------------------|----|----|---------|
| Papillary adenocarcinoma | n= | 25 | (73.5%) |
| Lepidic adenocarcinoma   | n= | 17 | (50%)   |
| Mucinous adenocarcinoma  | n= | 4  | (11.7%) |
| Micropapillary carcinoma | n= | 3  | (8.8%)  |

---

---

Table S2. Synthetic oligonucleotides used in the study

| RT-PCR                                                    |     |                                                                                           |
|-----------------------------------------------------------|-----|-------------------------------------------------------------------------------------------|
| MUC1                                                      |     | Forward: 5'-CCAGCACCGACTACTACCAAGAG-3'<br>Reverse: 5'-CGTCGTGGACATTGATGGT-3'              |
| MUC4                                                      |     | Forward: 5'-TGGGACGATGCTGACTTCTC-3'<br>Reverse: 5'-CCCCGTTGTTTGTTCATCTTTC-3'              |
| TET1                                                      |     | Forward: 5'-CCCGAATCAAGCGGAAGAATA-3'<br>Reverse: 5'-TACTTCAGGTTGCACGGT-3'                 |
| TET2                                                      |     | Forward: 5'-AAGGCTGAGGGACGAGAACGA-3'<br>Reverse: 5'-TGAGCCCATCTCCTGCTTCCA-3'              |
| TET3                                                      |     | Forward: 5'-CCTGCCGATGACAAGCTGGA-3'<br>Reverse: 5'-GAGTTCCCGGATAGAGGCGA-3'                |
| AID                                                       |     | Forward: 5'-AAAATGTCCGCTGGGCTAAG-3'<br>Reverse: 5'-AGGTCCCAGTCCGAGATGTAG-3'               |
| DNMT1                                                     |     | Forward: 5'-GAGGAAGCTGCTAAGGACTAGTTC-3'<br>Reverse: 5'-ACTCCACAATTTGATCACTAAATC-3'        |
| DNMT3a                                                    |     | Forward: 5'-ACAAGAATGCCACCAAAGCAG-3'<br>Reverse: 5'-TCATCCACCAAGACACAATGC-3'              |
| CAIX                                                      |     | Forward: 5'-CGGAAGAAAACAGTGCCTATGAG-3'<br>Reverse: 5'-CAGGGCGGTGTAGTCAGAGA-3'             |
| β-actin                                                   |     | Forward: 5'-CTCTTCCAGCCTTCCTTCCTG-3'<br>Reverse: 5'-GAAGCATTTGCGGTGGACGAT-3'              |
| MSE                                                       |     |                                                                                           |
| MUC1                                                      | 1st | Forward: 5'-AAAGGGGGAGGTTAGTTGGA-3'<br>Reverse: 5'-TACCCCTCACCTATAAACAC-3'                |
|                                                           | 2nd | Forward: 5'-[GC clamp*]AAGAGGTAGGAGGTAGGGGA-3'<br>Reverse: 5'-AAAACAAAACAAATTCAAAC-3'     |
| MUC4                                                      | 1st | Forward: 5'-AGAGTAAGGGGTGTATGGGTG-3'<br>Reverse: 5'-AACCTACCCCTTCATAAC-3'                 |
|                                                           | 2nd | Forward: 5'-[GC clamp*]AGGAGAGAAAAGGGTGATTAG-3'<br>Reverse: 5'-ACTCCACTACCCAACAACACTAC-3' |
| *GC clamp: 5'-CGCCCGCCGCGCGCGGGCGGGCGGGGCGGGGGCACGGGGG-3' |     |                                                                                           |

Table S3. Comparison of expression level or methylation index between permeation negative and positive.

| a) Non-neoplastic region                      |      |      |          |      |       |       |                      |          |       |       |          |       |                |                 |            |       |       |           |       |       |                |       |       |   |
|-----------------------------------------------|------|------|----------|------|-------|-------|----------------------|----------|-------|-------|----------|-------|----------------|-----------------|------------|-------|-------|-----------|-------|-------|----------------|-------|-------|---|
| Vascular permeation                           |      |      |          |      |       |       | Lymphatic permeation |          |       |       |          |       |                | Tumor size (TS) |            |       |       |           |       |       |                |       |       |   |
| negative                                      |      |      | positive |      |       |       | <i>p</i> value       | negative |       |       | positive |       |                |                 | TS < 20 mm |       |       | TS > 20mm |       |       | <i>p</i> value |       |       |   |
| n                                             | mean | ±SD  | n        | mean | ±SD   | n     |                      | mean     | ±SD   | n     | mean     | ±SD   | <i>p</i> value | n               | mean       | ±SD   | n     | mean      | ±SD   |       |                |       |       |   |
| Methylation index of <i>MUC4</i> promoter     |      |      |          |      |       |       |                      |          |       |       |          |       |                |                 |            |       |       |           |       |       |                |       |       |   |
| 5mC                                           | (19) | 59.4 | ±22.5    | (12) | 70.7  | ±28.1 | 0.226                | (8)      | 58.3  | ±27.3 | (23)     | 65.8  | ±24.5          | 0.475           | (6)        | 41.6  | ±18.9 | (25)      | 69.1  | ±23.6 | <b>0.013</b>   |       |       |   |
| 5hmC                                          | (19) | 19.2 | ±21.0    | (14) | 17.8  | ±12.4 | 0.506                | **       | (9)   | 29.3  | ±28.0    | (24)  | 14.6           | ±10.0           | 0.160      | *     | (8)   | 24.4      | ±28.3 | (25)  | 16.8           | ±13.0 | 0.486 | * |
| Expression level of mRNA                      |      |      |          |      |       |       |                      |          |       |       |          |       |                |                 |            |       |       |           |       |       |                |       |       |   |
| MUC4                                          | (19) | 2.25 | ±0.78    | (14) | 2.13  | ±0.72 | 0.666                | (9)      | 2.05  | ±0.67 | (24)     | 2.25  | ±0.78          | 0.509           | (8)        | 2.23  | ±0.82 | (25)      | 2.18  | ±0.74 | 0.876          |       |       |   |
| TET1                                          | (19) | 1.89 | ±0.44    | (14) | 1.79  | ±0.45 | 0.532                | (9)      | 2.00  | ±0.51 | (24)     | 1.79  | ±0.41          | 0.226           | (8)        | 1.97  | ±0.45 | (25)      | 1.81  | ±0.44 | 0.375          |       |       |   |
| TET2                                          | (17) | 0.28 | ±0.75    | (14) | 0.25  | ±0.66 | 0.895                | (7)      | 0.18  | ±0.51 | (24)     | 0.29  | ±0.76          | 0.728           | (7)        | -0.01 | ±0.66 | (24)      | 0.35  | ±0.70 | 0.238          |       |       |   |
| TET3                                          | (18) | 2.70 | ±0.67    | (14) | 2.46  | ±0.77 | 0.355                | (8)      | 2.34  | ±0.87 | (24)     | 2.68  | ±0.66          | 0.258           | (7)        | 2.21  | ±0.88 | (25)      | 2.70  | ±0.65 | 0.113          |       |       |   |
| AICDA                                         | (19) | 2.40 | ±0.55    | (14) | 2.27  | ±0.56 | 0.490                | (9)      | 2.52  | ±0.41 | (24)     | 2.28  | ±0.58          | 0.268           | (8)        | 2.53  | ±0.54 | (25)      | 2.28  | ±0.55 | 0.273          |       |       |   |
| GCM1                                          | (19) | 1.70 | ±0.48    | (14) | 1.58  | ±0.33 | 0.415                | (9)      | 1.83  | ±0.29 | (24)     | 1.58  | ±0.45          | 0.121           | (8)        | 1.91  | ±0.37 | (25)      | 1.56  | ±0.41 | <b>0.039</b>   |       |       |   |
| Dnmt1                                         | (18) | 0.01 | ±0.55    | (14) | -0.06 | ±0.53 | 0.729                | (9)      | -0.09 | ±0.45 | (23)     | 0.01  | ±0.57          | 0.647           | (8)        | 0.00  | ±0.57 | (24)      | -0.03 | ±0.53 | 0.921          |       |       |   |
| Dnmt3a                                        | (18) | 0.09 | ±0.38    | (14) | 0.01  | ±0.40 | 0.575                | (9)      | 0.27  | ±0.30 | (23)     | -0.03 | ±0.39          | <b>0.041</b>    | (8)        | 0.28  | ±0.33 | (24)      | -0.02 | ±0.38 | 0.060          |       |       |   |
| b) Neoplastic region                          |      |      |          |      |       |       |                      |          |       |       |          |       |                |                 |            |       |       |           |       |       |                |       |       |   |
| Vascular permeation                           |      |      |          |      |       |       | Lymphatic permeation |          |       |       |          |       |                | Tumor size (TS) |            |       |       |           |       |       |                |       |       |   |
| negative                                      |      |      | positive |      |       |       | <i>p</i> value       | negative |       |       | positive |       |                |                 | TS < 20 mm |       |       | TS > 20mm |       |       | <i>p</i> value |       |       |   |
| n                                             | mean | ±SD  | n        | mean | ±SD   | n     |                      | mean     | ±SD   | n     | mean     | ±SD   | <i>p</i> value | n               | mean       | ±SD   | n     | mean      | ±SD   |       |                |       |       |   |
| Methylation index of <i>MUC4</i> promoter     |      |      |          |      |       |       |                      |          |       |       |          |       |                |                 |            |       |       |           |       |       |                |       |       |   |
| 5mC                                           | (19) | 60.4 | ±27.5    | (12) | 72.8  | ±32.5 | 0.263                | (8)      | 52.9  | ±30.4 | (23)     | 69.5  | ±28.8          | 0.176           | (6)        | 50.8  | ±30.0 | (25)      | 68.6  | ±29.1 | 0.189          |       |       |   |
| 5hmC                                          | (19) | 39.8 | ±40.9    | (14) | 20.8  | ±12.3 | 0.199                | **       | (9)   | 31.8  | ±24.8    | (24)  | 31.7           | ±36.1           | 0.994      | (8)   | 45.7  | ±39.7     | (25)  | 27.3  | ±30.2          | 0.254 | **    |   |
| Expression level of mRNA                      |      |      |          |      |       |       |                      |          |       |       |          |       |                |                 |            |       |       |           |       |       |                |       |       |   |
| MUC4                                          | (19) | 2.44 | ±0.76    | (14) | 2.45  | ±1.07 | 0.962                | (9)      | 2.58  | ±0.73 | (24)     | 2.39  | ±0.95          | 0.599           | (8)        | 2.70  | ±0.61 | (25)      | 2.36  | ±0.95 | 0.351          |       |       |   |
| TET1                                          | (19) | 1.99 | ±0.64    | (14) | 1.83  | ±0.62 | 0.488                | (9)      | 2.33  | ±0.76 | (24)     | 1.77  | ±0.51          | <b>0.020</b>    | (8)        | 2.40  | ±0.69 | (25)      | 1.77  | ±0.54 | <b>0.011</b>   |       |       |   |
| TET2                                          | (17) | 0.34 | ±0.51    | (14) | 0.22  | ±0.65 | 0.588                | (7)      | 0.46  | ±0.46 | (24)     | 0.24  | ±0.60          | 0.375           | (7)        | 0.50  | ±0.40 | (24)      | 0.22  | ±0.61 | 0.264          |       |       |   |
| TET3                                          | (18) | 2.45 | ±0.93    | (14) | 2.72  | ±0.58 | 0.346                | (8)      | 2.49  | ±0.71 | (24)     | 2.59  | ±0.83          | 0.780           | (7)        | 2.55  | ±0.71 | (25)      | 2.57  | ±0.83 | 0.955          |       |       |   |
| AICDA                                         | (19) | 2.32 | ±0.60    | (14) | 2.28  | ±0.72 | 0.868                | (9)      | 2.58  | ±0.63 | (24)     | 2.20  | ±0.62          | 0.127           | (8)        | 2.43  | ±0.58 | (25)      | 2.27  | ±0.67 | 0.541          |       |       |   |
| GCM1                                          | (19) | 1.63 | ±0.68    | (14) | 1.58  | ±0.62 | 0.815                | (9)      | 1.89  | ±0.76 | (24)     | 1.51  | ±0.58          | 0.130           | (8)        | 1.82  | ±0.63 | (25)      | 1.54  | ±0.65 | 0.295          |       |       |   |
| Dnmt1                                         | (18) | 0.08 | ±0.64    | (14) | -0.05 | ±0.52 | 0.527                | (9)      | 0.37  | ±0.57 | (23)     | -0.11 | ±0.54          | <b>0.032</b>    | (8)        | 0.31  | ±0.47 | (24)      | -0.07 | ±0.60 | 0.117          |       |       |   |
| Dnmt3a                                        | (18) | 0.11 | ±0.46    | (14) | -0.06 | ±0.49 | 0.330                | (9)      | 0.40  | ±0.45 | (23)     | -0.10 | ±0.41          | <b>0.005</b>    | (8)        | 0.38  | ±0.43 | (24)      | -0.08 | ±0.44 | <b>0.014</b>   |       |       |   |
| c) comparison between neoplasm and non-neoasm |      |      |          |      |       |       |                      |          |       |       |          |       |                |                 |            |       |       |           |       |       |                |       |       |   |

|                                           | Vascular permeation positive |       |       |                   |       |       |                      | Lymphatic permeation positive |       |       |                   |       |       |                      | Early stage (TS < 20 mm) |       |       |                   |      |       |                      |
|-------------------------------------------|------------------------------|-------|-------|-------------------|-------|-------|----------------------|-------------------------------|-------|-------|-------------------|-------|-------|----------------------|--------------------------|-------|-------|-------------------|------|-------|----------------------|
|                                           | non-neoplastic region        |       |       | neoplastic region |       |       |                      | non-neoplastic region         |       |       | neoplastic region |       |       |                      | non-neoplastic region    |       |       | neoplastic region |      |       |                      |
|                                           | n                            | mean  | ±SD   | n                 | mean  | ±SD   | p value <sup>p</sup> | n                             | mean  | ±SD   | n                 | mean  | ±SD   | p value <sup>p</sup> | n                        | mean  | ±SD   | n                 | mean | ±SD   | p value <sup>p</sup> |
| Methylation index of <i>MUC4</i> promoter |                              |       |       |                   |       |       |                      |                               |       |       |                   |       |       |                      |                          |       |       |                   |      |       |                      |
| 5mC                                       | (12)                         | 70.7  | ±28.1 | (12)              | 72.8  | ±32.5 | 0.707                | (23)                          | 65.8  | ±24.5 | (23)              | 69.5  | ±28.8 | 0.370                | (6)                      | 41.6  | ±18.9 | (6)               | 50.8 | ±30.0 | 0.257                |
| 5hmC                                      | (14)                         | 17.8  | ±12.4 | (14)              | 20.8  | ±12.3 | 0.420                | (24)                          | 14.6  | ±10.0 | (24)              | 31.7  | ±36.1 | <b>0.004</b> **      | (8)                      | 24.4  | ±28.3 | (8)               | 45.7 | ±39.7 | 0.297                |
| Expression level of mRNA                  |                              |       |       |                   |       |       |                      |                               |       |       |                   |       |       |                      |                          |       |       |                   |      |       |                      |
| MUC4                                      | (14)                         | 2.13  | ±0.72 | (14)              | 2.45  | ±1.07 | 0.178                | (24)                          | 2.25  | ±0.78 | (24)              | 2.39  | ±0.95 | 0.384                | (8)                      | 2.23  | ±0.82 | (8)               | 2.70 | ±0.61 | 0.084                |
| TET1                                      | (14)                         | 1.79  | ±0.45 | (14)              | 1.83  | ±0.62 | 0.770                | (24)                          | 1.79  | ±0.41 | (24)              | 1.77  | ±0.51 | 0.750                | (8)                      | 1.97  | ±0.45 | (8)               | 2.40 | ±0.69 | <b>0.009</b>         |
| TET2                                      | (14)                         | 0.25  | ±0.66 | (14)              | 0.22  | ±0.65 | 0.861                | (24)                          | 0.29  | ±0.76 | (24)              | 0.24  | ±0.60 | 0.579                | (7)                      | -0.01 | ±0.66 | (7)               | 0.50 | ±0.40 | <b>0.016</b>         |
| TET3                                      | (14)                         | 2.46  | ±0.77 | (14)              | 2.72  | ±0.58 | 0.157                | (24)                          | 2.68  | ±0.66 | (24)              | 2.59  | ±0.83 | 0.563                | (7)                      | 2.21  | ±0.88 | (7)               | 2.55 | ±0.71 | 0.500                |
| AICDA                                     | (14)                         | 2.27  | ±0.56 | (14)              | 2.28  | ±0.72 | 0.901                | (24)                          | 2.28  | ±0.58 | (24)              | 2.20  | ±0.62 | 0.512                | (8)                      | 2.53  | ±0.54 | (8)               | 2.43 | ±0.58 | 0.567                |
| GCM1                                      | (14)                         | 1.58  | ±0.33 | (14)              | 1.58  | ±0.62 | 0.987                | (24)                          | 1.58  | ±0.45 | (24)              | 1.51  | ±0.58 | 0.485                | (8)                      | 1.91  | ±0.37 | (8)               | 1.82 | ±0.63 | 0.679                |
| Dnmt1                                     | (14)                         | -0.06 | ±0.53 | (14)              | -0.05 | ±0.52 | 0.934                | (23)                          | 0.01  | ±0.57 | (23)              | -0.11 | ±0.54 | 0.213                | (8)                      | 0.00  | ±0.57 | (8)               | 0.31 | ±0.47 | 0.179                |
| Dnmt3a                                    | (14)                         | 0.01  | ±0.40 | (14)              | -0.06 | ±0.49 | 0.357                | (23)                          | -0.03 | ±0.39 | (23)              | -0.10 | ±0.41 | 0.089                | (8)                      | 0.28  | ±0.33 | (8)               | 0.38 | ±0.43 | 0.194                |

ks.test is Kolmogorov–Smirnov test. Performs an F test to compare the variances of two samples from normal populations. p value is calculated by equal variance t test, Unequal variance t test (\*) or Mann-Whitney U test (\*\*), p value p is calculated by paired t test. n: negative, p: positive, N: non-neoplastic region, T: neoplastic region, E: Early stage (T score=1a), L: Late stage (T score>1a)
